# Supplementary material for: Hsa-miR-21-3p associates with breast cancer patient survival and targets genes in tumor suppressive pathways
Source: PubMed Central journal article supplement (PMC8604322; doi:10.1371/journal.pone.0260327), 2021-11-19
Supplement: pone.0260327.s007.pdf [file pone.0260327.s007.pdf]

**Clinical and pathological characteristics of BRCA cohort-1**

|                              |        | <b>miR21-3p mRNA</b>    | <b>p-value</b> |
|------------------------------|--------|-------------------------|----------------|
|                              | n =139 | median (25 and 75%)     |                |
| <b>Age</b>                   |        |                         | 0.263          |
| < 50                         | 53     | 0.114 (-0.420, 1.277)   |                |
| ≥ 50                         | 86     | -0.157 (-1.007, 0.815)  |                |
| <b>Estrogen receptor</b>     |        |                         | 0.483          |
| Negative                     | 46     | -0.261 (-0.988, 0.818)  |                |
| Positive                     | 89     | 0.116 (-0.677, 1.104)   |                |
| Unknown                      | 4      |                         |                |
| <b>Progesterone receptor</b> |        |                         | 0.361          |
| Negative                     | 63     | -0.247 (-0.910, 0.801)  |                |
| Positive                     | 69     | 0.1271 (-0.677, 1.201)  |                |
| Unknown                      | 7      |                         |                |
| <b>HER2 status</b>           |        |                         | 0.286          |
| Negative                     | 116    | -0.041 (-0.921, 1.025)  |                |
| Positive                     | 22     | 0.239 (-0.330, 1.172)   |                |
| Unknown                      | 1      |                         |                |
| <b>Tumor size</b>            |        |                         | 0.340          |
| ≤ 20                         | 45     | 0.269 (-0.517, 1.018)   |                |
| > 20                         | 94     | -0.157 (-0.974, 0.997)  |                |
| Unknown                      | 0      |                         |                |
| <b>Histologic Grade</b>      |        |                         | 0.473          |
| 1                            | 12     | 0.130 (-0.439, 1.327)   |                |
| 2                            | 79     | 0.042 (-1.021, 1.032)   |                |
| 3                            | 47     | -0.063 (-0.625, 0.774)  |                |
| Unknown                      | 1      |                         |                |
| <b>Ki67</b>                  |        |                         | 0.247          |
| 1                            | 94     | 0.060 (-0.724, 1.071)   |                |
| 2                            | 28     | -0.354 (-1.166, 0.395)  |                |
| 3                            | 15     | -0.247 (-0.452, 0.750)  |                |
| Unknown                      | 2      |                         |                |
| <b>Nodes</b>                 |        |                         | 0.573          |
| Negative                     | 55     | -0.063 (-0.862, 0.936)  |                |
| Positive                     | 67     | 0.021 (-0.733, 1.186)   |                |
| Unknown                      | 17     |                         |                |
| <b>Histology subtype</b>     |        |                         | 0.305          |
| Ductal                       | 120    | -0.036 (-0.890, 0.905)  |                |
| Ductal_lobular               | 1      | 0.854                   |                |
| Ductal_mucino                | 1      | 0.713                   |                |
| Lobular                      | 11     | 0.429 (-0.069, 1.927)   |                |
| Medullary                    | 4      | -0.749 (-1.110, -0.061) |                |
| Metaplastic                  | 0      | NA                      |                |
| Metastasis_ade               | 1      | (-0.997)                |                |
| Mucinous                     | 1      | (-1.136)                |                |
| <b>Subtype Hu et al.</b>     |        |                         | 0.462          |
| Basal                        | 24     | -0.361 (-0.975, 0.430)  |                |
| ERBB2                        | 13     | 0.114 (-0.275, 0.817)   |                |
| LumA                         | 42     | 0.159 (-0.902, 0.969)   |                |

|                   |    |                        |       |
|-------------------|----|------------------------|-------|
| LumB              | 29 | -0.059 (-1.161, 1.104) |       |
| Normal            | 11 | 0.384 (-0.443, 2.594)  |       |
| unclassified      | 12 | -0.053 (-0.694, 1.324) |       |
| Unknown           | 6  |                        |       |
| <b>Metastasis</b> |    |                        | 0.021 |
| M0                | 62 | -0.416 (-1.041, 0.691) |       |
| M1                | 76 | 0.307 (-0.358, 1.306)  |       |
| Unknown           | 1  |                        |       |

---

---
